# Supplementary material for: Monoculture of Leafcutter Ant Gardens
Source: PLOS journal article supplement (doi:10.1371/journal.pone.0012668), 2010-09-10
Supplement: S5 (10.1371/journal.pone.0012668.s005) [file journal.pone.0012668.s005]

**Table S4. Repeat microsatellite genotyping of *Attamyces* cultivars from *Atta cephalotes* colonies surveyed in 2003 and 2008.**

Garden samples were collected through excavation from the same four nests of *Atta cephalotes* (see Materials and Methods and caption for Table S3)

Sample IDs from Dec2003 in the leftmost column (e.g., I-A or IV-D) refer to the the garden IDs shown in the second column in Table S3.

Samples were genotyped at 15 microsatellite loci through multiplex analysis, as described in Ishak et al. (in preparation; see also Material and Methods).

Markers were scored blind without knowledge of identity of a particular sample.

1 = marker present. 0 = marker absent. ? = unclear whether allele is present or absent.

The label "fail" indicates that the analysis failed for the locus and the analysis was not repeated.

Within each nest, no marker differed between 2003 and 2008.

| Nest & Sample ID | Collection Date | C101 |     |     |     | C606 |      | B12  |      |      |      | D115 |      |      | B150 |    |    |     | C117 |     |     | A1030 |      |
|------------------|-----------------|------|-----|-----|-----|------|------|------|------|------|------|------|------|------|------|----|----|-----|------|-----|-----|-------|------|
|                  |                 | 108  | 111 | 120 | 123 | 138  | 147  | 193  | 198  | 202  | 214  | 235  | 239  | 250  | 79   | 86 | 95 | 103 | 171  | 174 | 177 | 196   | 198  |
| Colony 2         |                 |      |     |     |     |      |      |      |      |      |      |      |      |      |      |    |    |     |      |     |     |       |      |
| 2 I-A Dec2003    | December 2003   | 0    | 1   | 0   | ?   | 1    | 0    | 0    | 1    | 0    | 0    | fail | fail | fail | 1    | 1  | 0  | 0   | 0    | 1   | 0   | 1     | 0    |
| 2 IV-D Dec2003   | December 2003   | 0    | 1   | 0   | 1   | 1    | 0    | 0    | 1    | 0    | 0    | 1    | 0    | 1    | 1    | 1  | 0  | 0   | 0    | 1   | 0   | 1     | 0    |
| 2-1 Jun2008      | June 2008       | 0    | 1   | 0   | 1   | 1    | 0    | 0    | 1    | 0    | 0    | 1    | 0    | 1    | 1    | 1  | 0  | 0   | 0    | 1   | 0   | 1     | 0    |
| 2-2 Jun2008      | June 2008       | 0    | 1   | 0   | ?   | fail | fail | 0    | 1    | 0    | 0    | 1    | 0    | 1    | 1    | 1  | 0  | 0   | 0    | 1   | 0   | 1     | 0    |
| Colony 9         |                 |      |     |     |     |      |      |      |      |      |      |      |      |      |      |    |    |     |      |     |     |       |      |
| 9 I-C Dec2003    | December 2003   | 1    | 0   | ?   | ?   | 1    | 1    | 1    | 0    | 1    | 1    | 1    | 1    | 0    | 0    | 0  | 1  | 0   | 1    | 1   | 1   | fail  | fail |
| 9 I-F Dec2003    | December 2003   | 1    | 0   | 1   | 1   | 1    | 1    | 1    | 0    | 1    | 1    | 1    | 1    | 0    | 0    | 0  | 1  | 0   | 1    | 1   | 1   | fail  | fail |
| 9-1 Jun2008      | June 2008       | 1    | 0   | 1   | 1   | 1    | 1    | 1    | ?    | 1    | 1    | 1    | 1    | 0    | 0    | 0  | 1  | 0   | 1    | 1   | 1   | 0     | 1    |
| 9-2 Jun2008      | June 2008       | 1    | 0   | 1   | 1   | ?    | 1    | fail | fail | fail | fail | 1    | 1    | 0    | 0    | 0  | 1  | 0   | 1    | 1   | 1   | 0     | 1    |
| Colony 12        |                 |      |     |     |     |      |      |      |      |      |      |      |      |      |      |    |    |     |      |     |     |       |      |
| 12 I-A Dec2003   | December 2003   | 1    | 0   | 1   | 1   | 1    | 1    | fail | fail | fail | fail | 1    | ?    | 0    | 0    | 0  | 1  | 1   | 0    | 1   | 0   | 0     | 1    |
| 12 I-C Dec2003   | December 2003   | 1    | 0   | 1   | 1   | 1    | 1    | fail | fail | fail | fail | 1    | 1    | 0    | 0    | 0  | 1  | 1   | 0    | 1   | 0   | 0     | 1    |
| 12-1 Jun2008     | June 2008       | 1    | 0   | 1   | 1   | 1    | 1    | fail | fail | fail | fail | 1    | 1    | 0    | 0    | 0  | 1  | 1   | 0    | 1   | 0   | 0     | 1    |
| 12-2 Jun2008     | June 2008       | 1    | 0   | 1   | 1   | 1    | 1    | fail | fail | fail | fail | 1    | 1    | 0    | 0    | 0  | 1  | 1   | 0    | 1   | 0   | 0     | 1    |
| Colony 13        |                 |      |     |     |     |      |      |      |      |      |      |      |      |      |      |    |    |     |      |     |     |       |      |
| 13 I-D Dec2003   | December 2003   | 0    | 1   | 0   | 1   | 1    | 0    | fail | fail | fail | fail | 1    | 0    | 1    | 1    | 1  | 0  | 0   | 0    | 1   | 0   | 1     | 0    |
| 13 I-G Dec2003   | December 2003   | 0    | 1   | 0   | 1   | 1    | 0    | fail | fail | fail | fail | 1    | 0    | 1    | 1    | 1  | 0  | 0   | 0    | 1   | 0   | 1     | 0    |
| 13-1 Jun2008     | June 2008       | 0    | 1   | 0   | 1   | 1    | 0    | fail | fail | fail | fail | 1    | 0    | 1    | 1    | 1  | 0  | 0   | 0    | 1   | 0   | 1     | 0    |
| 13-2 Jun2008     | June 2008       | 0    | 1   | 0   | 1   | 1    | 0    | fail | fail | fail | fail | 1    | 0    | 1    | 1    | 1  | 0  | 0   | 0    | 1   | 0   | 1     | 0    |

| A435 |     |     |     | A1132 |     |     | B319 |      | A1151 |    |     |     | A128 |     |     |     |     | C126 |      | B430 |      |      |      | C1133 |      |      |      |      |
|------|-----|-----|-----|-------|-----|-----|------|------|-------|----|-----|-----|------|-----|-----|-----|-----|------|------|------|------|------|------|-------|------|------|------|------|
| 233  | 235 | 236 | 239 | 105   | 111 | 118 | 195  | 201  | 92    | 98 | 104 | 106 | 201  | 204 | 208 | 210 | 212 | 244  | 246  | 146  | 150  | 156  | 160  | 218   | 228  | 230  | 233  | 236  |
| 1    | 1   | 0   | 0   | 1     | 0   | 1   | 1    | 0    | 1     | 0  | 1   | 0   | 1    | 1   | 1   | 0   | 0   | fail | fail | 0    | 1    | 1    | 0    | fail  | fail | fail | fail | fail |
| 1    | 1   | 0   | 0   | 1     | 0   | 1   | 1    | 0    | 1     | 0  | 1   | 0   | 1    | 1   | 1   | 0   | 0   | 1    | 1    | 0    | 1    | 1    | 0    | 1     | 1    | 1    | 0    | 0    |
| 1    | 1   | 0   | 0   | 1     | 0   | 1   | 1    | 0    | 1     | 0  | 1   | 0   | 1    | 1   | 1   | 0   | 0   | 1    | 1    | 0    | 1    | 1    | 0    | 1     | 1    | 1    | 0    | 0    |
| 1    | 1   | 0   | 0   | 1     | 0   | 1   | fail | fail | 1     | 0  | 1   | 0   | 1    | 1   | 1   | 0   | 0   | 1    | 1    | 0    | 1    | 1    | 0    | 1     | 1    | 1    | 0    | 0    |
| 1    | 0   | 1   | 1   | 1     | 1   | 1   | 0    | 1    | 0     | 1  | 0   | 1   | 0    | 1   | 0   | 0   | 1   | fail | fail | 1    | 0    | 0    | 1    | 0     | 0    | 0    | 1    | 1    |
| 1    | 0   | 1   | 1   | 1     | 1   | 1   | 0    | 1    | 0     | 1  | 0   | 1   | 0    | 1   | 0   | 0   | 1   | 1    | 1    | 1    | 0    | 0    | 1    | 0     | 0    | 0    | 1    | 1    |
| 1    | 0   | 1   | 1   | 1     | 1   | 1   | 0    | 1    | 0     | 1  | 0   | 1   | 0    | 1   | 0   | 0   | 1   | 1    | 1    | 1    | 0    | 0    | 1    | 0     | 0    | 0    | 1    | 1    |
| 1    | 0   | 1   | 1   | 1     | 1   | 1   | 0    | 1    | 0     | 1  | 0   | 1   | 0    | 1   | 0   | 0   | 1   | fail | fail | fail | fail | fail | fail | 0     | 0    | 0    | 1    | 1    |
| 1    | 0   | 1   | 1   | 1     | 1   | 1   | 0    | 1    | 0     | 1  | 0   | 1   | 0    | 1   | 0   | 0   | 1   | fail | fail | 1    | 0    | 0    | 1    | 0     | 0    | 0    | 1    | 1    |
| 1    | 0   | 1   | 1   | 1     | 1   | 1   | 0    | 1    | 0     | 1  | 0   | 1   | 0    | 1   | 0   | 0   | 1   | 1    | 1    | 1    | 0    | 0    | 1    | 0     | 0    | 0    | 1    | 1    |
| 1    | 1   | 0   | 0   | 1     | 0   | 1   | fail | fail | 1     | 0  | 1   | 0   | 0    | 1   | 0   | 1   | 0   | 1    | 1    | 0    | 1    | 1    | 0    | 1     | 0    | 1    | 0    | 0    |
| 1    | 1   | 0   | 0   | 1     | 0   | 1   | fail | fail | 1     | 0  | 1   | 0   | 0    | 1   | 0   | 1   | 0   | 1    | 1    | 0    | 1    | 1    | 0    | 1     | 0    | 1    | 0    | 0    |
| 1    | 1   | 0   | 0   | 1     | 0   | 1   | 1    | 1    | 1     | 0  | 1   | 0   | 0    | 1   | 0   | 1   | 0   | 1    | 1    | 0    | 1    | 1    | 0    | 1     | 0    | 1    | 0    | 0    |
| 1    | 1   | 0   | 0   | 1     | 0   | 1   | 1    | 1    | 1     | 0  | 1   | 0   | 0    | 1   | 0   | 1   | 0   | 1    | 1    | 0    | 1    | 1    | 0    | 1     | 0    | 1    | 0    | 0    |
